# Supplementary material for: Interaction between HLA-G and NK cell receptor KIR2DL4 orchestrates HER2-positive breast cancer resistance to trastuzumab
Source: PubMed Central journal article supplement (PMC8219715; doi:10.1038/s41392-021-00629-w), 2021-06-23
Supplement: 41392_2021_629_MOESM2_ESM.pdf [file 41392_2021_629_MOESM2_ESM.pdf]

**Representative pathological reports and  
computerized tomography (CT) scan results  
for patients involved in trastuzumab  
sensitivity study**

# Resistant patient #3

## Pathological report

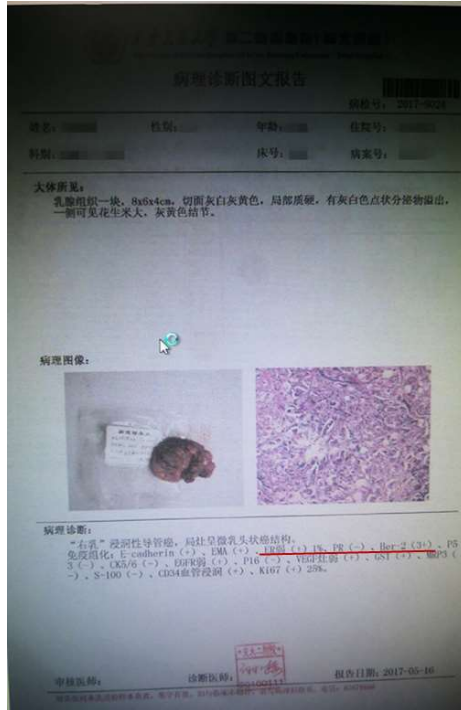

## Pre-operative CT

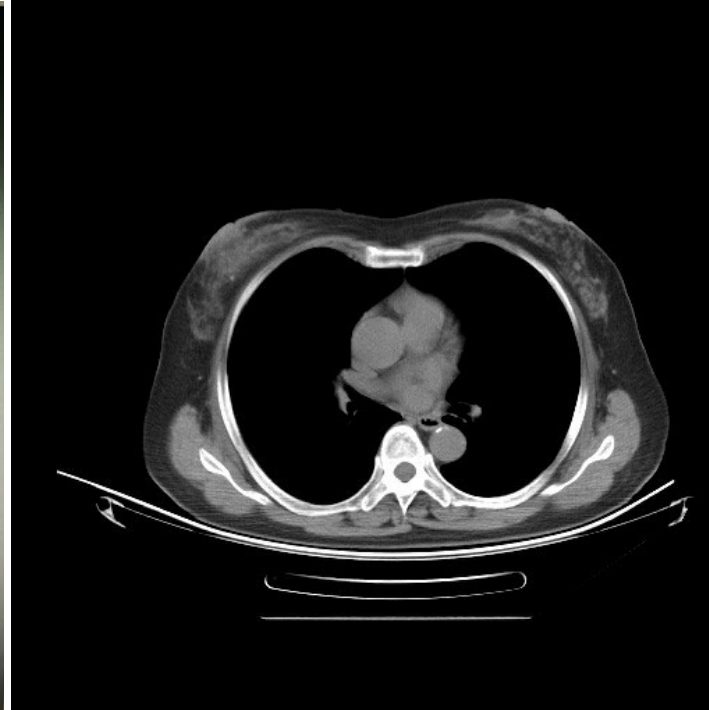

## Post-operative CT

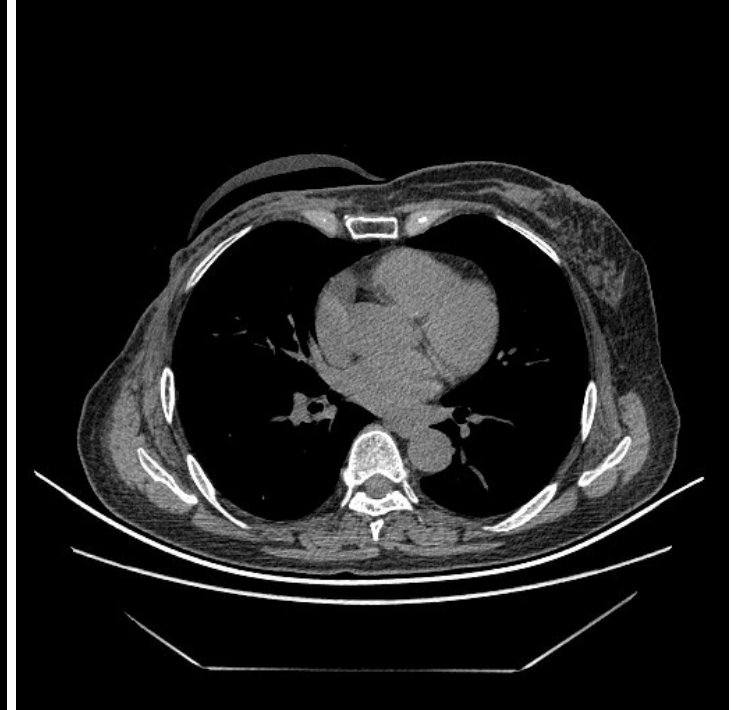

### Pathologic Findings:

A piece of mammary gland tissue (8x6x4 cm), with grayish yellow cut surface, local hard tumor texture, overflow of grayish punctate secretion, grayish yellow nodules as large as a peanut on one side.

### Pathologic Diagnosis:

Ductal Infiltrating carcinoma of the right breast with micropapillary carcinoma architecture in local foci.

### Immunohistochemical results:

E-cadherin (+), EMA(+), ER weak(+) 1%, PR(-), Her-2(3+), P53(-), CK5/6(-), EGFR weak(+), P16(-), VGFR weak(+), GST(+), MRP3 (-), S-100 (-), vascular infiltrating CD34(+), Ki67 (+) 25%

# Resistant patient #12

## Pathological report

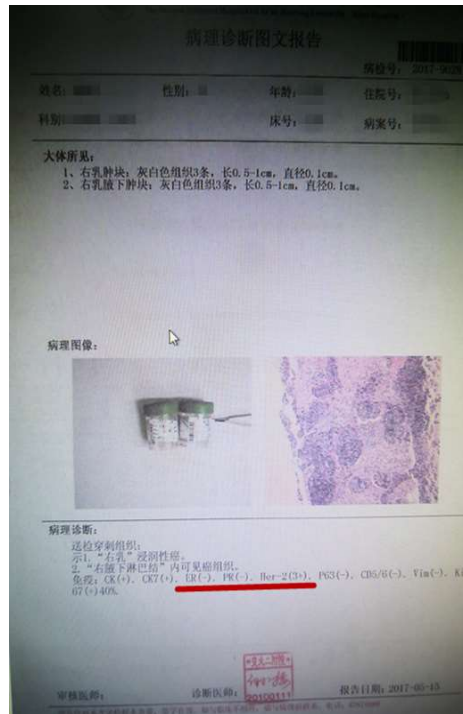

## Pre-operative CT

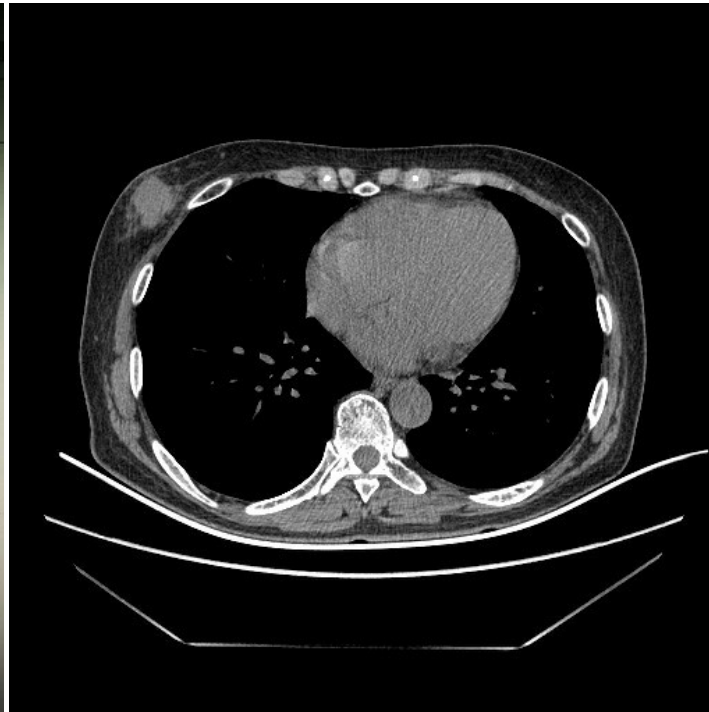

## Post-operative CT

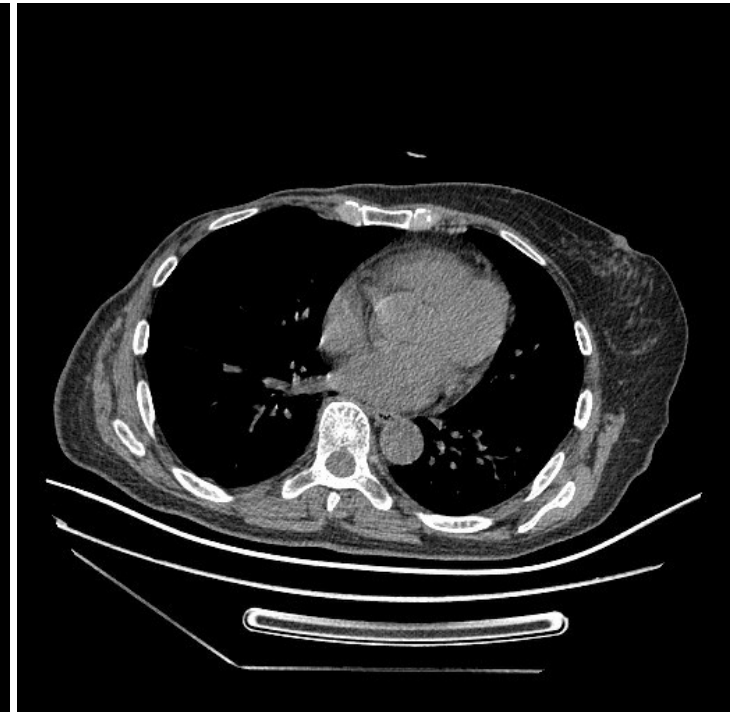

## Pathologic Findings:

1. Right breast mass, 3 strips of grayish white tissue, 0.5-1 cm in length and 0.1 cm in diameter.
2. Axillary mass in the right breast, 3 strips of grayish white tissues, 0.5-1 cm in length and 0.1 cm in diameter

## Pathologic Diagnosis:

Submitted puncture tissue;

1. Infiltrating carcinoma of the right breast.
2. Cancer tissue was observed in the right axillary lymph node.

## Immunohistochemical results:

CK(+), CK7(+), ER (-), PR(-), Her-2(3+), P63(-), CD5/6(-), Vim(-), Ki67 (+) 40%

# Sensitive patient #19

## Pathological report

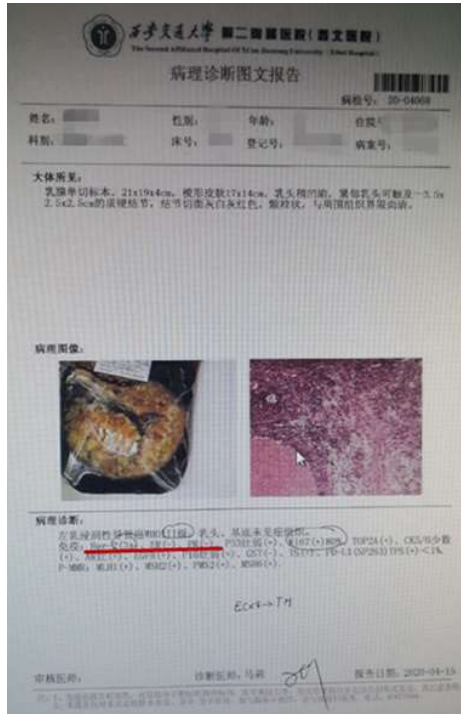

## Pre-operative CT

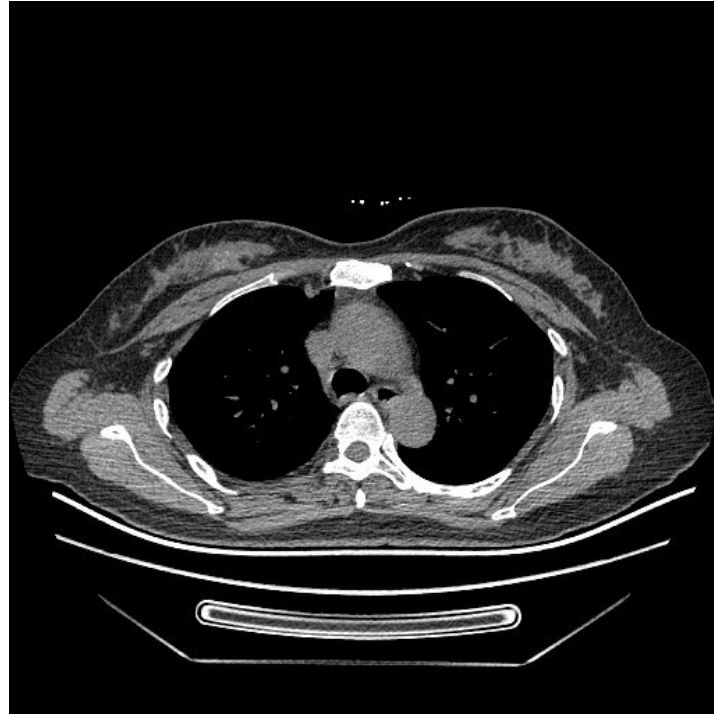

## Post-operative CT

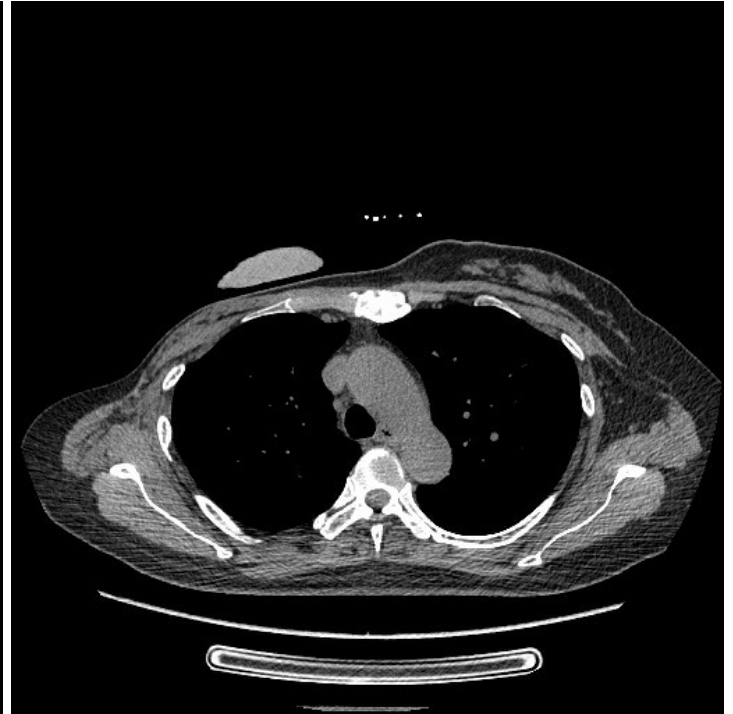

### Pathologic Findings:

Single mastectomy breast specimens (21x19x4 cm), shuttle type skin (17x14 cm), slightly depressed papillae, palpable hard nodule adjacent to papillae (3.5x2.5x2.5 cm), with grayish red cut surface, granular; the boundary with the surrounding tissues was still clear.

### Pathologic Diagnosis:

Ductal Infiltrating carcinoma of the left breast (NOS grade II); no cancer tissue was observed in the base tissue.

### Immunohistochemical results:

Her-2(3+), ER(-), PR(-), P53weak(+), Ki67 (+) 80%, TOP2A(+), CK5/6weak(+), AR(+), EGFR (+), P16weak(+), GST(-), TS(+), PD-L1(SP263)TPS(+) <1%

**MMR detection:** MLH1(+), MSH2(+), PMS2(+), MSH6(+)

# Sensitive patient #28

## Pathological report

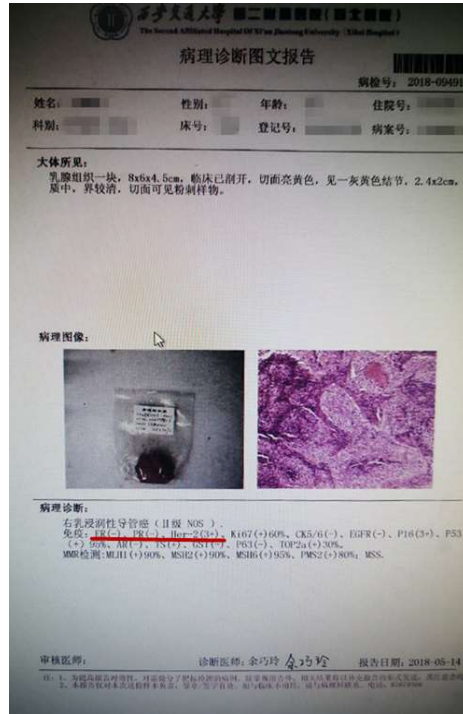

## Pre-operative CT

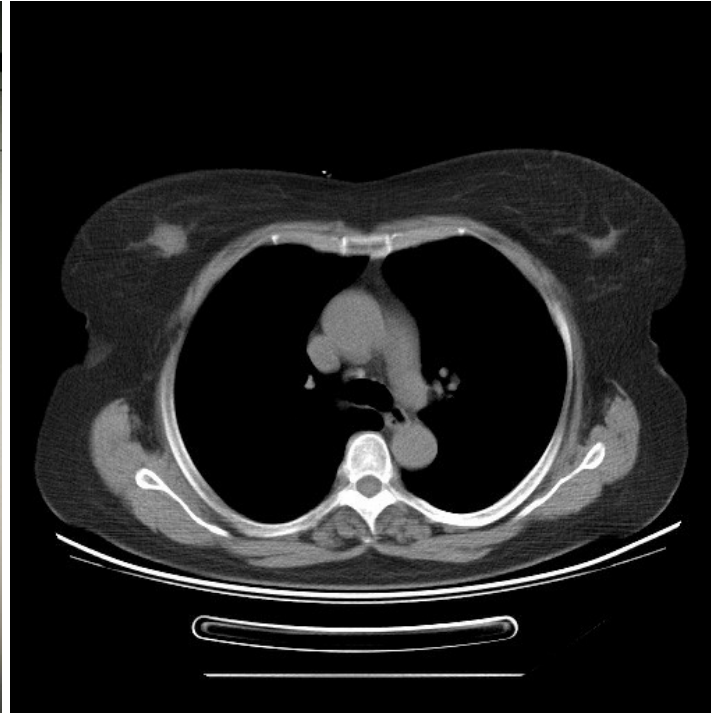

## Post-operative CT

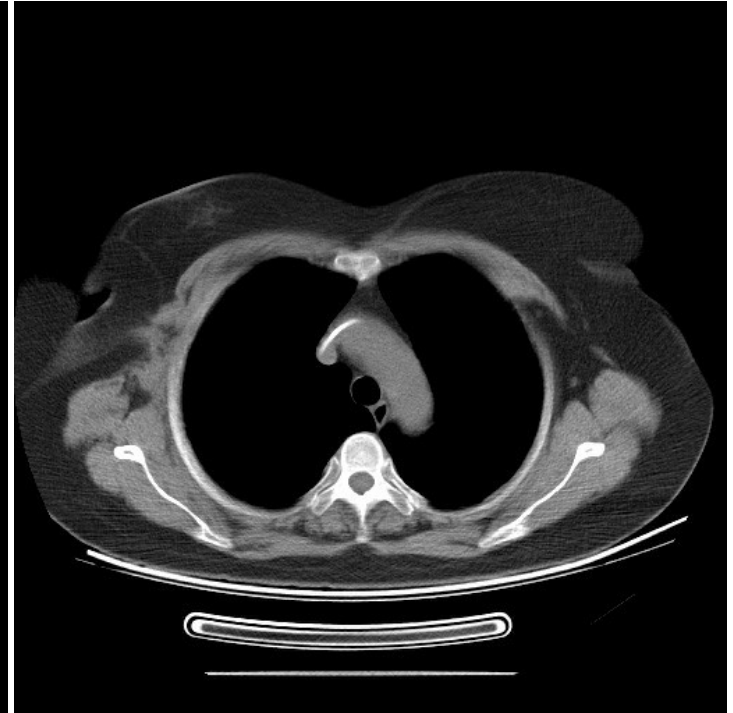

### Pathologic Findings:

A piece of mammary gland tissue (8x6x4.5 cm), clinically dissected, with bright yellow cut surface, a grayish yellow nodules (2.4x2 cm) found, medium tumor texture, clear boundary, visible comedo sample on cut surface.

### Pathologic Diagnosis:

Ductal Infiltrating carcinoma of the right breast (NOS grade II)

### Immunohistochemical results:

ER(-), PR(-), Her-2(3+), Ki67 (+) 60%, CK5/6(-), EGFR (-), P16(3+), P53(+), AR(-), TS(+), GST(-), P63(-), TOP2a(+), 30%

**MMR detection:** MLH1(+), MSH2(+), MSH6(+), PMS2(+), MSS
